# Supplementary material
Source: PubMed Central journal article supplement (PMC2633822)
Supplement: pp.108.132449_2.pdf [file pp.108.132449_2.pdf]

## SUPPLEMENTARY DATA

**Table SI. Primers for Genotyping, RT-PCR, and qRT-PCR**

|                                |                            |
|--------------------------------|----------------------------|
| <i>fzr2-1</i> T-DNA Forward    | TGGAAAGTGCCCTGAATGAAGC     |
| <i>fzr2-1</i> T-DNA Reverse    | TGATGATGCTCAATGATGGAAA     |
| <i>fzr2-2</i> T-DNA Forward    | TGGTTGTAAATGTGCAAAGCCTG    |
| <i>fzr2-2</i> T-DNA Reverse    | CATGCCAGGGCTCCAACCTCTT     |
| RT-PCR 5' Segment Forward      | GGAAGAAGAAGATCCTACAGCAAGC  |
| RT-PCR 5' Segment Reverse      | TCCCTAGTCCCCTGCTAGAACAT    |
| RT-PCR 3' Segment Forward      | AGAGAGCTAGCATCTGGTGGAAA    |
| RT-PCR 3' Segment Reverse      | TGCTCCTGTTACAATCGTCTGTCC   |
| RT-PCR Full-length Forward     | GGAAGAAGAAGATCCTACAGCAAGC  |
| RT-PCR Full-length Reverse     | AATTTATGACTTTTTCTGTGT      |
| <i>PAE2</i> Forward            | CTGACATTGAGGTTTATCTCAGATCG |
| <i>PAE2</i> Reverse            | CTCAACTCGATAAAATCCATTATCTG |
| <i>FZR2</i> Realtime 5'        | TTATGTGATCTCGGAGCTGAGGAT   |
| <i>FZR2</i> Realtime 3'        | CCCATATCTGAACTTTCCCGGTA    |
| <i>FZR1</i> Realtime 5'        | GTCTCCTTATAAGGTATTGGATGC   |
| <i>FZR1</i> Realtime 3'        | ATCGACCCCAAGATCGCATAAC     |
| <i>FZR3</i> Realtime 5'        | AATCTGGCGTGGAGCAAGAA       |
| <i>FZR3</i> Realtime 3'        | AGTGTTGCAACCTTTGACATGG     |
| <i>UBIQUITIN10</i> Realtime 5' | TGCGCTGCCAGATAATACTACTATT  |
| <i>UBIQUITIN10</i> Realtime 3' | TGCTGCCCAACATCAGGTT        |

**Figure S1. Enlarged images of wildtype (A) and *AP3::FZR2* (B) petal cells.** Ridges characteristic of Arabidopsis petal cells can be seen on both plants, and the *AP3::FZR2* cells tend to have conical protrusions. Scale bar: 20  $\mu$ m.
