# Supplementary material
Source: PubMed Central journal article supplement (PMC2633822)

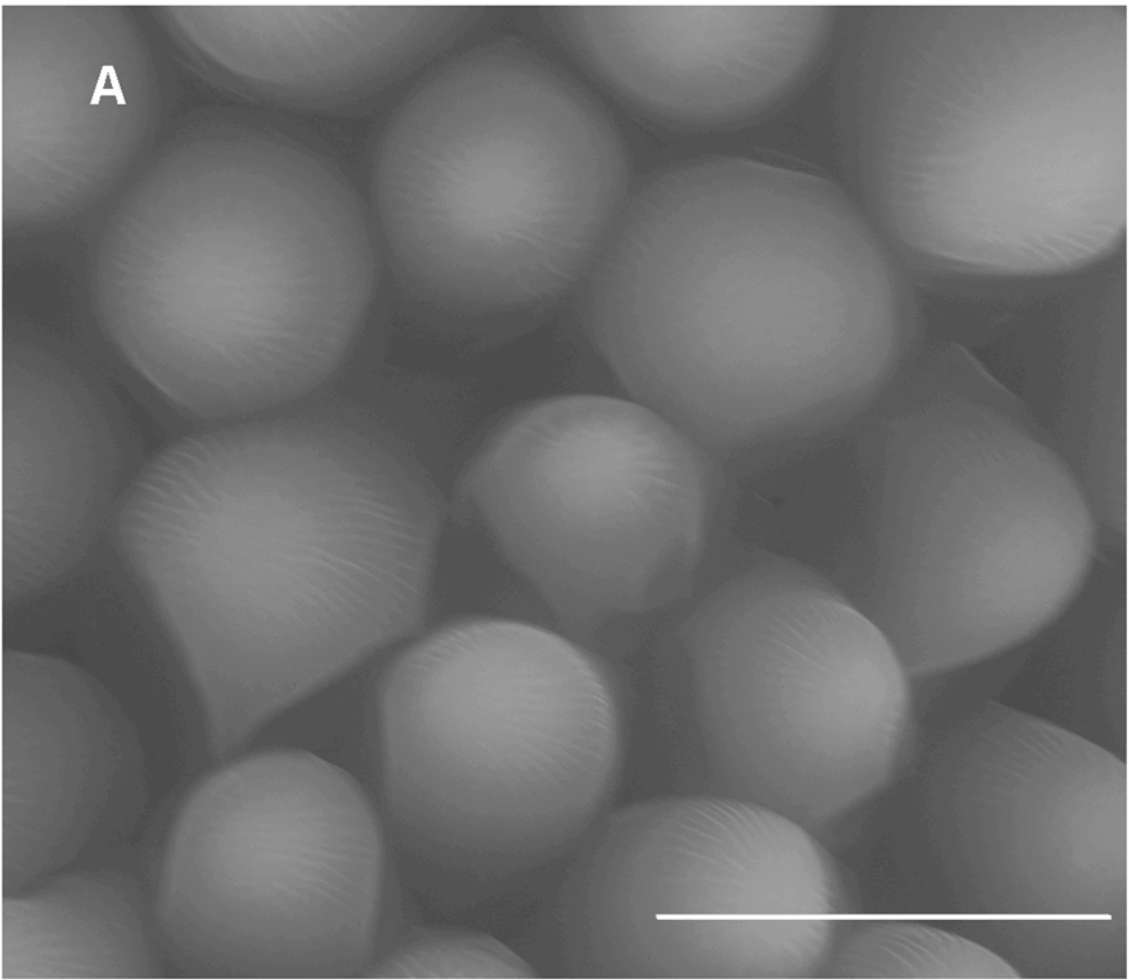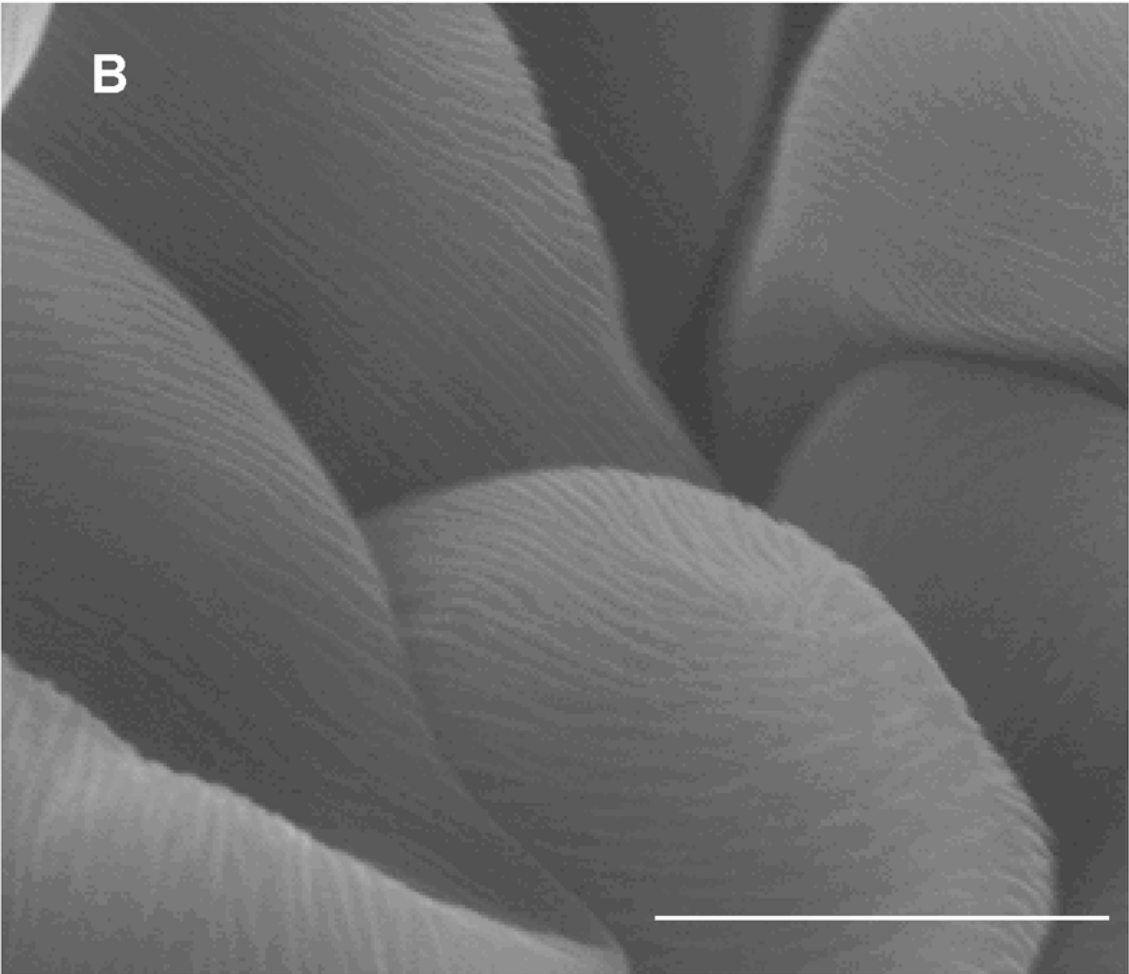

Supplement: pp.108.132449_1.pdf [file pp.108.132449_1.pdf]
